1 **Direct shoot regeneration from cotyledon, leaf and root of**

2 ***Citrus jambhiri* Lush.**

3 **Priyanka Sharma, Bidhan Roy\***

4 Department of Seed Science and Technology, Faculty of Agriculture, Uttar Banga Krishi

5 Viswavidyalaya, Pundibari, Cooch Behar 736165, West Bengal, India

6 \*E-mail: bcroy10@yahoo.com

7

8 All authors contributed equally to this work.

9 ABSTRACT

10 *Citrus jambhiri* (Rough lemon) is popularly preferred for rootstock for cultivated species of  
11 *Citrus*. Tissue culture is an appreciable technique for mass-multiplication of plant propagules.  
12 In this communication direct regeneration of plantlets of *Citrus jambhiri* Lush. were obtained  
13 from cotyledons, roots and leaves. Most of the cotyledon (96%) enlarged on medium  
14 supplemented with 50 mg/L of casein hydrolysate. Few of those enlarged cotyledons  
15 responded to direct regeneration of shoots. Maximum shoot per responded cotyledon was 32.  
16 Conversely, the health of the plantlets were poor with semi-cylindrical leaves. Most of them  
17 died on maintenance medium or on rooting medium and died. Plantlets regenerated on  
18 medium supplemented with IAA in combination with IBA were healthy and they established  
19 on maintenance medium and rooted on rooting medium. Direct regeneration was also  
20 obtained from leaf on MS medium supplemented with 0.50 mg/L of dicamba. Our finding  
21 concluded that tissue culture tools may be used for direct regeneration of plantlets from  
22 different explants of *C. jambhiri* to obtain true-to-type plant propagules.

23 **Keywords:** Direct regeneration, rough lemon, casein hydrolysate, cotyledon, root, leaf

## 24 **Introduction**

25 Citrus is one of the most popular edible fruit and it is being cultivated worldwide. Eastern  
26 Asia, particularly the south-east Asia is thought to be the primary centre of origin of *Citrus*  
27 species and in this region, many citrus species are still found in their wild state [1]. The  
28 north-eastern region of India is a part of the centre of origin and rich in diversity  
29 of citrus with wild and endangered species. It has wide range of uses, such as table purpose,  
30 processed products, culinary purpose as well as pharmaceutical products. A large number of  
31 different species are available under the genus- *C. jambhiri* (Rough lemon) is generally  
32 preferred for rootstock for lemons, oranges, mandarins, grape fruits and kinnows for its high  
33 vigour and wide adaptability well adaptation ability under problem soils and odd situations  
34 [2-4]. This species was found to have tolerant ability towards many biotic and abiotic  
35 stresses.

36 Direct regeneration of plantlets from somatic tissues hold extreme importance as it  
37 will produce true-to-type plantlets. There is ample changes of somaclonal variations in  
38 indirect regeneration of plantlets through callus induction. Thus, direct regeneration of  
39 plantlets from explant may play important role in mass-multiplication of true-to-type plant  
40 propagules. There are large number of research works on direct regeneration from nodal  
41 segment and shoot tips of *Citrus* species [1, 5-7]. However, limited research findings are  
42 available on direct regeneration from cotyledon, leaf and root of *Citrus* spp. Contrariwise,  
43 plenty successful research findings are available on indirect regeneration through callus  
44 initiation and plantlet regeneration [3, 7-12]. Hence, in this endeavour effort was taken to  
45 standardize protocol for direct regeneration of plantlets from cotyledon, root and leaf of  
46 *Citrus jambhiri* Lush.

## 47 **Materials and methods**

48 **Plant materials**

49 Collected mature fruits of *C. jambhiri* Lush. were cut with sharp knife and seeds were  
50 extracted manually. Seeds were surface sterilized with 0.1% HgCl<sub>2</sub> for 10 minutes followed  
51 by 3-5 times washing with sterilized distilled water.

52 **Medium preparation**

53 Medium was prepared using all of the individual chemical compounds listed by Murashige  
54 and Skoog [13]. Individual stock solutions were prepared and stored in separate bottles for  
55 ready use during the preparation of culture media. MS medium was prepared with 3%  
56 sucrose and 0.8% agar. The pH of medium was adjusted to 5.8. The media were autoclaved at  
57 121 °C under 104 kPa for 15 minutes for sterilization.

58 **Inoculation for direct regeneration from cotyledons**

59 Surface sterilized seeds were inoculated on MS medium fortified with different  
60 concentrations of casein hydrolysate and different concentrations and combinations of growth  
61 regulators as listed in Table 1. Cultures were then incubated in culture room at 25±2 °C with  
62 16/8 h light and dark phases for six weeks.

63 **Inoculation for direct regeneration from root**

64 Similarly, the surface sterilized seeds were inoculated on MS medium added with different  
65 concentrations and combinations of IAA and IBA as listed in Table 2. Cultures were then  
66 incubated in culture room at 25±2 °C with 16/8 h light and dark phases for six weeks.

67 **Inoculation for direct regeneration from leaf**

68 Surface sterilized seeds inoculated on MS basal medium for germination and establishment of  
69 seedling. Seeds in culture bottles were kept in culture room at  $25\pm 2$  °C with 16/8 h light and  
70 dark phases. Six week old *in vitro* established seedling were used as source material for leaf  
71 explant. Leaves were excised from seedlings under laminar air flow cabinet. Leaves were  
72 injured with the help of the back side of the scalpel. The leaves were inoculated on MS  
73 medium fortified with different concentrations and combination of growth regulators as listed  
74 in Table 3. The cultures were again kept in culture room at  $25\pm 2$  °C with 16/8 h light and  
75 dark phases.

## 76 **Results**

### 77 **Direct Regeneration from Cotyledon**

78 The experiment was set to study the efficiency of direct shoots regeneration from cotyledons  
79 of germinating seeds of *C. jambhiri*. During the process of germination of seeds, the  
80 cotyledon enlarges. It varied from 96% to 26% (Table 1). High response towards  
81 enlargement of cotyledon was observed in medium fortified with casein hydrolysate. Medium  
82 added with 50 mg/L of casein hydrolysate produced maximum number of enlarged  
83 cotyledons (96%) followed by 100 mg/L of casein hydrolysate (84%) and 200 mg/L of casein  
84 hydrolysate (78%). Average weight of enlarged cotyledons varied from 0.517 to 1.628  
85 g/cotyledon with a mean of 0.76 g/cotyledon (Table 1). Largest cotyledons by weight were  
86 achieved on the synthetic medium supplemented with 50 mg/L of casein hydrolysate (1.628  
87 g/cotyledon) followed by 100 mg/L of casein hydrolysate (1.148 g/cotyledon) and 200 mg/L  
88 of casein hydrolysate (1.050 g/cotyledon).

89 Direct regeneration from enlarged cotyledon was observed when MS medium  
90 supplemented with 50 mg/L of casein-hydrolysate (Fig. 1A,B&C) and IAA of 1.0 mg/L + 1.0  
91 mg/L of IBA (Fig. 2A,B,C&D). However, the direct regeneration from cotyledon was

92 random, only seven cotyledons produced direct shoots (Table 1), three on medium  
93 supplemented with 50 mg/L of casein-hydrolysate and four on medium supplemented with  
94 1.0 mg/L of IAA + 1.0 mg/L of IBA. The seeds that were inoculated on the medium fortified  
95 with 50 mg/L of casein hydrolysate, after three weeks of inoculation, numerous globular  
96 growth was observed on the enlarged cotyledon (Fig. 1A&B). Few of those globular growth  
97 regenerated into plantlets without roots. Leaves of regenerated plantlets were not normal (Fig.  
98 1A&B), it was narrow and cylindrical (Fig. 1D).

99

100 **Fig. 1. Direct regeneration from cotyledons of *Citrus jambhiri* when inoculated on MS**  
101 **supplemented with 50 mg/L of casein-hydrolysate. A) Initiation of multiple buds on cotyledon: 1]**  
102 **Enlarge cotyledon, 2] Multiple sprouted buds; B) Grownup of multiple plantlets on cotyledon: 3]**  
103 **Plumule developed from the seed, 4] Radicle (root) developed from the seed, 5] Grownup of multiple**  
104 **plantlets; C) Grownup of multiple plantlets were separated from cotyledon and again culture on MS**  
105 **basal medium; D) Multiple plantlets regeneration from cotyledonary axil of germinating seeds when**  
106 **inoculated on MS medium supplemented with 50 mg/L of casein hydrolysate.**

107

108 In contrast, the cotyledon enlarged on IAA @ 1.0 mg/L + IBA @ 1.0 mg/L  
109 supplemented medium produced prominent globular callus like structure with light green  
110 pigmentation (Fig. 2A). Gradually those globular structure converted into plantlets (Fig.  
111 2B,C&D). The regenerated plantlets on IAA @ 1.0 mg/L + IBA @ 1.0 mg/L fortified  
112 medium were normal as that of plantlets regenerated from the cotyledonary axis. Highest  
113 number of shoots (32 shoots/cotyledon; Fig. 1B; Table 1) was recorded on 50 mg/L of casein-  
114 hydrolysate followed by 12 shoots/cotyledon on the medium with same growth regulators  
115 (Fig. 2D; Table 1).

116

117 **Fig. 2. Direct regeneration from cotyledons of *Citrus jambhiri*.** A) Direct embryogenesis on MS  
118 medium fortified with 1 mg/L of IAA and 1 mg/L IBA; B) Shoot regeneration on MS medium  
119 fortified with 1 mg/L of IAA and 1 mg/L IBA; C) Magnified portion of regenerating shoot from  
120 cotyledon; D) Multiple shoot regeneration on IAA and 1 mg/L IBA.

### 121 **Direct regeneration from root**

122 Direct regeneration from the root of germinating seeds were observed in *Citrus jambhiri*  
123 when seeds were inoculated on MS added with 1.0 mg/L of IAA and 1.0 mg/L IBA (Fig. 3  
124 A,B&C). This event was unintended and random. Germination of seeds was usual, producing  
125 radicle and plumule simultaneously (Fig. 3A[1]). The tap root of germinating seed grew  
126 about 2.50 cm without touching the medium (Fig. 3A[2]). Direct regeneration of shoot and  
127 root were observed when it touched medium (Fig. 3B&C[3]). Only two root showed direct  
128 regeneration (Table 2). The direct *in vitro* regenerated shoots were hardened and finally  
129 transferred to the field as per the guidelines of [7].

130 **Fig. 3. Direct regeneration from roots of *Citrus jambhiri*.** A,B&C) Direct regenerated plantlets: 1]  
131 Plumules from the germinated seeds, 2] Tap root of germinating seed grew about 2.50 cm without  
132 touching the medium, 3] Shoot regenerated directly from the root.

### 133 **Direct regeneration from leaf**

134 A protocol was developed for direct plantlet regeneration from *in vitro* regenerated leaf  
135 explants of *C. jambhiri*. Leaves excised from axenic shoot cultures were used to induce  
136 organogenesis on MS medium added with different combinations and concentrations of  
137 growth regulators (Table 3). Medium added with 0.50 mg/L of dicamba showed very small  
138 callus on the leaf. Gradually the leaf dried up and the callus showed regeneration on the  
139 callus induction medium (Fig. 4B). Only 9.75% of the leaf callus on medium fortified with 50  
140 mg/L of dicamba showed this type of regeneration (Table 3).

## 141 Discussion

142 Direct regeneration of plantlets is commonly practiced for *in vitro* mass-multiplication of  
143 citrus because it ensures maximum genetic uniformity of the resulting plants [1, 14]. Direct  
144 regeneration from cotyledon of *C. jambhiri* is the novel finding of this endeavour. There are  
145 lot of research findings of indirect regeneration (through callus induction and shoots  
146 regeneration) from cotyledon derived callus of citrus species [3, 8, 10-12]. Contrariwise, as  
147 per the search for the literature in 'Google Search', there is no finding on direct regeneration  
148 of shoots from cotyledon of citrus species. Ample references are also available on direct  
149 shoot multiplication from nodal segments [1, 6, 7, 9, 15, 16], shoot tips [6, 7, 16, 17],  
150 cotyledonary node [18, 19], axillary buds [20] and meristem culture [21] of different citrus  
151 species.

152 Direct regeneration from cotyledon was obtained when the MS medium was  
153 supplemented with 50 mg/L of casein hydrolysate and 1.0 mg/L of IAA in combination with  
154 1.0 mg/L of IBA. Large number of plantlets regenerated from cotyledon when the MS  
155 medium was supplemented with 50 mg/L of casein hydrolysate, but the health of the plantlets  
156 were weak with mostly semi-cylindrical leaves. Casein hydrolysate overcomes the shortage  
157 of glutamine when there is insufficient phosphorus for adequate biosynthesis however several  
158 investigators have concluded that casein hydrolysate itself is more effective for plant culture  
159 than the addition of the major amino acids. This has led to assumption that casein  
160 hydrolysates might contain some unknown growth promoting factor [22].

161 Most of the plantlets obtained on casein hydrolysate added medium died during  
162 subsequent course of the culture. Only few of the plantlets survive and rooted on the rooting  
163 medium. Yet, the plantlets regenerated on 1.0 mg/L of IAA in combination with 1.0 mg/L of  
164 IBA added medium were normal. Plantlets were rooted and planted in field after hardening.



165 Direct plantlets regeneration from root also very scanty. Bhat et al. [23] recorded *de*  
166 *novo* shoot bud initiation in basal medium at a low frequency during three years of  
167 continuous culture of roots of *Citrus aurantifolia* (Christm.) Swing. There are ample research  
168 findings on indirect regeneration (through callus induction and shoots regeneration) from root  
169 derived callus of citrus species [2, 9, 24]. However, research findings on direct regeneration  
170 from root of *C. jambhiri* is not available. Thus, our research finding on direct regeneration of  
171 plantlet from root is innovative.

172 Direct plantlet regeneration from leaf segments represent a promising tool for mass-  
173 multiplication of citrus keeping the genetic fidelity intact. To date, direct organogenesis from  
174 leaf explants of *C. jambhiri* is not available. Explants on a medium with a high concentration  
175 of cytokinin-to-auxin ratio, they will develop buds/shoots [25-27]. Kasprzyk-Pawelec et al.  
176 [28] also reported this type of direct organogenesis from leaf explant of *C. limon* L. Burm cv.  
177 ‘Primofiore’ when the leaf explants were cultured on MS medium supplemented with 3.5  
178 m/L of BAP. Finding of Hu et al. [29] correspondingly suggested that cytokinin was the  
179 primary factor for shoot organogenesis in citrus. However, some reports are available on  
180 direct regeneration from leaf of plant species other than citrus. Varutharaju et al. [30]  
181 standardized an efficient protocol for direct plantlet regeneration has for the medicinal plant  
182 *Aerva lanata* (L.) Juss. ex Schult. An efficient propagation and regeneration system through  
183 direct plantlet organogenesis from leaf explant was established in *Lysionotus serratus* by Li  
184 et al. [31]. They found that high concentration of 6-benzyladenine (BA) or thidiazuron (TDZ)  
185 was effective for direct organogenesis. Tilkat et al. [32] developed a protocol for direct  
186 plantlet regeneration from leaf explants of male *Pistacia vera* L. cv. ‘Atl’’. Leaves excised  
187 from axenic shoot cultures of pistachio were used to induce organogenesis on MS medium  
188 with Gamborg vitamins added with different combinations and different concentrations of  
189 BAP and IAA. Bobatk et al. [33] obtained direct shoot organogenesis of *Drosera rotundifolia*

190 L. on MS basal medium or MS medium supplemented with  $10^{-8}$  M NAA. Liquid culture  
191 medium significantly increased regeneration capacity of leaf tissue. Their findings on direct  
192 shoot organogenesis was supported by histological and scanning electron microscopy  
193 investigations and it was found that direct plant regeneration was without intermediate callus  
194 formation.

## 195 **Conclusion**

196 Direct regeneration were achieved from cotyledons, roots and leaves. The regeneration  
197 obtained from leaves was through callus induction, but plantlets induction taken place on  
198 callus induction medium. The plantlets obtained from cotyledons on MS medium  
199 supplemented with 0.5 mg/L of casein hydrolysate were poor in health and most of the  
200 plantlets died on maintenance medium or on rooting medium. Only few of them survived.  
201 The cotyledonary plantlets obtained on IAA and IBA supplemented medium were normal in  
202 health all the regenerated plantlets survived and rooted on rooting medium. Plantlets  
203 regeneration from root was random. Only 9.75% *in vitro* growing seedlings responded to  
204 direct plantlets regeneration. The plantlets regenerated from roots were in good health and  
205 they all survived and rooted on rooting medium. Our findings established that the tissue  
206 culture tool may be used for direct regeneration to obtain true-to-type plant propagules.

## 207 **References**

- 208 1. Goswami K, Sharma R, Singh PK, Singh G. Micropropagation of seedless lemon  
209 (*Citrus limon* L. cv. Kaghzi Kalan) and assessment of genetic fidelity of  
210 micropropagated plants using RAPD markers. *Physiol. Mol. Biol. Plants*. 2013;  
211 19(1): 137–145.
- 212 2. Savita V, Virk GS, Nagpal A. Effect of explant type and different plant growth  
213 regulators on callus induction and plantlet regeneration in *Citrus jambhiri* Lush.  
214 *Environ. We Int. J. Sci. Tech*. 2010; 5: 97–106.

- 215 3. Savita V, Singh B, Virk GS, Nagpal AK. An efficient plant regeneration protocol  
216 from callus cultures of *Citrus jambhiri* Lush. *Physiol. Mol. Biol. Plants*. 2011;  
217 17(2): 161–169.
- 218 4. Kaur S. *In vitro* somatic embryogenesis and regeneration from epicotyl segments  
219 of Rough lemon (*Citrus jambhiri* Lush.). *Int. J. Chem. Studies*. 2018; 6(1):  
220 2082–2091.
- 221 5. Kumar K, Kaur H, Gill MIS, Rattanpal HS, Kanika and Gosal SS. An efficient  
222 regeneration protocol from callus culture in rough lemon (*Citrus jambhiri*).  
223 *Indian J. Agric. Sci*. 2011; 81(4): 324–329.
- 224 6. Taye MG, Debesay B, Tesfahun Y, Brhanu A. Optimization of an *in vitro*  
225 regeneration protocol for rough lemon rootstock (*Citrus jambhiri* L.) via direct  
226 organogenesis. *Adv. Crop Sci. Tech*. 2018; 6: 1.
- 227 7. Sharma P, Roy B. Preparation of synthetic seeds of *citrus jambhiri* using *in vitro*  
228 regenerated multiple plantlets. *Biotechnol. J. Int*. 2020; 24(2): 22–29.
- 229 8. Deepika K, Kanwar R. *In vitro* regeneration of *Punica granatum* L. plants from  
230 different juvenile explants. *J. Fruit Ornamental Plant Res*. 2010; 18(1): 5–22.
- 231 9. Yaacob JS, Mahmad N, Taha RM, Mohamed N, Yussof AIM, Saleh A.  
232 Optimization of culture conditions (sucrose, pH, and photoperiod) for *in vitro*  
233 regeneration and early detection of somaclonal variation in ginger lime (*Citrus*  
234 *assamensis*). *The Scientific World J*. 2014;  
235 <http://dx.doi.org/10.1155/2014/262710>
- 236 10. Waghmare V, Pandhure N. Induction and regeneration of callus from different  
237 explants in *Citrus reticulata* (Blanco.). *Int. J. Cur. Res. Rev*. 2015; 13: 84–88.
- 238 11. Badr-Elden AEM. Establishment of in direct propagation of mandarin (*Citrus*  
239 *reticulata* L.) using tissue culture. *Egypt. J. Bot*. 2017; 57(3): 405–416.
- 240 12. Fatonah S, Lestari W, Isda MN, Purba L. *In vitro* shoot regeneration of *Citrus*  
241 *nobilis* Lour. from intact seed and cotyledon explants. *SABRAO J. Breed.*  
242 *Genet*. 2018; 50(2): 168–179.
- 243 13. Murashige T, Skoog F. A revised medium for rapid growth and bioassays with  
244 tobacco tissue culture. *Physiol. Plant*. 1962; 15: 473–497.
- 245 14. Rathore J, Rathore M, Singh M, Singh R, Shekhawat N. Micropropagation of  
246 mature tree of *Citrus limon*. *Indian J. Biotechnol*. 2007; 6(2): 239–244.

- 247 15. Usman M, Sana M and Fatima B. *In vitro* multiple shoot induction from nodal  
248 explants of citrus cultivars. J. Cent. Euro. Agric. 2005; 6(4):435–442.
- 249 16. Upadhyay S, Syamal MM, Itoo M. Micropropagation of sweet orange cv.  
250 Mosambi through shoot tips and nodal segments. Indian J. Hort. 2010; 67: 21–  
251 25.
- 252 17. Siwach P, Chanana S, Gill AR, Dhandra P, Rani J, Sharma K, Rani H, Kumari D.  
253 *In vitro* somatic embryogenesis and regeneration from epicotyl segments of  
254 Rough lemon (*Citrus jambhiri* Lush.). African J. Biotechnol. 2012; 11(92):  
255 15852–15862.
- 256 18. El-Morsy AA, Millet B. Rhythmic growth and optimization of micropropagation:  
257 the effect of excision time and position of axillary buds on *in vitro* culture of  
258 *Citrus aurantium* L. Ann. Bot. 1996; 78: 197–202.
- 259 19. Pandey A, Tamta S. Efficient micropropagation of *Citrus sinensis* (L.) Osbeck  
260 from cotyledonary explants suitable for the development of commercial variety.  
261 African J. Biotechnol. 2016; 15(34): 1806–1812.
- 262 20. Kitto SL, Young MJ. *In vitro* propagation of *Carrizo citrange*. HortSci. 1981; 16:  
263 305–306.
- 264 21. Sarker I, Islam J, Shaekh MPE, Rahman MM, Khan H, Chowdhury ASMHK,  
265 Mukim MSI, Islam R, Haque R. Establishment of a standard protocol for *in vitro*  
266 meristem culture and plant regeneration of *Citrus aurantifolia*. IOSR J. Pharm.  
267 Biol. Sci. 2015; 10(2): 61–69.
- 268 22. George EF. Plant Tissue Culture Procedure – Background, in: George, E.F.,  
269 Hall, M.A., Klerk, G.J.D. (eds.), Plant Propagation by Tissue Culture: Volume 1.  
270 The Background. Springer, P.O. Box 17, 3300 AA Dordrecht, The Netherlands.  
271 2008; 1–28.
- 272 23. Bhat SR, Chitralkha P, Chandel KPS. Regeneration of plants from long-term  
273 root culture of lime, *Citrus aurantifolia* (Christm.) Swing. Plant Cell, Tiss. Organ  
274 Cult. 1992; 29: 19–25.
- 275 24. Fraternali D, Giamperi L, Bucchini A, Cara P, Ricci D. *In vitro* plant regeneration  
276 from callus of *Citrus x monstrosa* (Pompia), an endemic citrus of sardinia.  
277 Natural Product Comm. 2010; 5(6): 927–930.
- 278 25. Curaba J, Singh MB, Bhalla PL. miRNAs in the crosstalk between  
279 phytohormone signalling pathways. J. Exp. Bot. 2014; 65: 1425–1438.

- 280 26. Motte H, Vereecke D, Geelen D, Werbrouck S. The molecular path to *in vitro*  
281 shoot regeneration. *Biotechnol. Adv.* 2014; 32: 107–121.
- 282 27. Schaller GE, Bishopp A, Kieber JJ. The yin-yang of hormones: cytokinin and  
283 auxin interactions in plant development. *Plant Cell.* 2015; 27: 44–63.
- 284 28. Kasprzyk-Pawelec A, Pietrusiewicz J, Szczuka E. *In vitro* regeneration induced in  
285 leaf explants of *Citrus limon* L. Burm cv. ‘Primofiore’. *Acta Sci. Pol. Hortorum*  
286 *Cultus.* 2015; 14(4): 143–153.
- 287 29. Hu W, Fagundez S, Katin-Grazzini L, Li Y, Li, W, Chen Y, Wang X, Deng Z, Xie  
288 S, McAvoy RJ, Li Y. Endogenous auxin and its manipulation influence *in vitro*  
289 shoot organogenesis of citrus epicotyl explants. *Hort. Res.* 2017; 4: 17071.
- 290 30. Varutharaju K, Soundar Raju C, Thilip C, Aslam A, Shajahan A. High efficiency  
291 direct shoot organogenesis from leaf segments of *Aerva lanata* (L.) Juss. Ex  
292 Schult by using thidiazuron. *The Scientific World J.* 2014;  
293 <http://dx.doi.org/10.1155/2014/652919>
- 294 31. Li Q, Deng M, Zhang J, Zhao W, Song Y, Quanjian Li, Huang Q. Shoot  
295 organogenesis and plant regeneration from leaf explants of *Lysionotus serratus*  
296 D. Don. *The Scientific World J.* 2013; <http://dx.doi.org/10.1155/2013/280384>
- 297 32. Tilkat E, Onay A, Yildirim H, Ayaz E. Direct plant regeneration from mature leaf  
298 explants of pistachio, *Pistacia vera* L. *Scientia Horticulturae.* 2009; 121: 361–  
299 365.
- 300 33. Bobatk M, Blehovai A, Krigtfn J, Ovecka M, Samaj J. Direct plant regeneration  
301 from leaf explants of *Drosera rotundifolia* cultured. *Plant Cell, Tiss. Organ Cult.*  
302 1995; 43: 43–49.

303

304

305

306

307 **Table 1. Effect of different concentrations and combination of growth regulators on direct**  
 308 **regeneration from cotyledon of *C. jambhiri* on casein-hydrolysate supplemented MS media.**

| Treatments | No. of seeds produced enlarged cotyledons | Average weight of enlarged cotyledons (g) | No. of cotyledon produced multiple shoots | Sl. No. of cotyledon produced multiple shoots | No. of multiple shoots/ cotyledon |          |
|------------|-------------------------------------------|-------------------------------------------|-------------------------------------------|-----------------------------------------------|-----------------------------------|----------|
|            |                                           |                                           |                                           |                                               | Individual cotyledon              | Mean     |
| T1         | 48 (96%)                                  | 1.628 a                                   | 3.0                                       | 1                                             | 32.0 a                            | 15.0 a   |
|            |                                           |                                           |                                           | 2                                             | 12.0 b                            |          |
|            |                                           |                                           |                                           | 3                                             | 1.0 e                             |          |
| T2         | 42 (84%)                                  | 1.148 b                                   | 0.0                                       | -                                             | 0.0 f                             | 0.0 c    |
| T3         | 39 (78%)                                  | 1.050 b                                   | 0.0                                       | -                                             | 0.0 f                             | 0.0 c    |
| T4         | 28 (56%)                                  | 0.517 d                                   | 0.0                                       | -                                             | 0.0 f                             | 0.0 c    |
| T5         | 32 (64%)                                  | 0.553 d                                   | 0.0                                       | -                                             | 0.0 f                             | 0.0 c    |
| T6         | 37 (74%)                                  | 0.815 c                                   | 4.0                                       | 1                                             | 3.0 d                             | 3.0 b    |
|            |                                           |                                           |                                           | 2                                             | 1.0 e                             |          |
|            |                                           |                                           |                                           | 3                                             | 7.0 c                             |          |
|            |                                           |                                           |                                           | 4                                             | 1.0 e                             |          |
| T7         | 13 (26%)                                  | 0.682 e                                   | 0.0                                       | -                                             | 0.0 f                             | 0.00     |
| Total      | 239                                       | -                                         | 7.0                                       | -                                             | -                                 | -        |
| Range      | 13-48 (96-26%)                            | 0.517-1.628                               | 0.0-4.0                                   | -                                             | 1.0-32.0                          | 3.0-15.0 |
| Mean       | 34.14 (68.29%)                            | 0.76                                      | 3.50                                      | -                                             | 8.14                              | 9.0      |

309

310 **T1:** Casein-Hydrolysate @ 50 mg/L; **T2:** Casein-Hydrolysate @ 100 mg/L; **T3:** Casein-Hydrolysate  
 311 @ 200 mg/L; **T4:** IAA @ 1.0 mg/L; **T5:** IBA @ 1.0 mg/L; **T6:** IAA @ 1.0 mg/L + IBA @ 1.0 mg/L;  
 312 **T7:** BAP @ 1.0 mg/L.

313 \*Values bearing same letter in the column are not significantly different at  $p = 0.05$  of LSD

314

315

316

317 **Table 2. Effect of growth regulator on direct shoot regeneration from root of *Citrus jambhiri*.**

| Treatment |      | No. of seed inoculated | No. of seedling responded to direct regeneration from root | % of response | Average No. of shoots per inoculated shoot |
|-----------|------|------------------------|------------------------------------------------------------|---------------|--------------------------------------------|
| IAA       | IBA  |                        |                                                            |               |                                            |
| 0.50      | 0.50 | 60                     | 0.0                                                        | 0.00          | 0.00                                       |
| 1.00      | 0.50 | 60                     | 0.0                                                        | 0.00          | 0.00                                       |
| 0.50      | 1.00 | 60                     | 0.0                                                        | 0.00          | 0.00                                       |
| 1.00      | 1.00 | 60                     | 2.0                                                        | 3.33          | 4.50                                       |
| 1.00      | 1.50 | 60                     | 0.0                                                        | 0.00          | 0.00                                       |
| 1.00      | 2.00 | 60                     | 0.0                                                        | 0.00          | 0.00                                       |
| 1.50      | 1.00 | 60                     | 0.0                                                        | 0.00          | 0.00                                       |
| 2.00      | 1.00 | 60                     | 0.0                                                        | 0.00          | 0.00                                       |

318

319

320

321

322 **Table 3. Effect of different concentrations and combinations of growth regulators on direct**

323 **shoot regeneration from leaf of *C. jambhiri*.**

| Treatments                       | Callus induction (%) | Regeneration on callus induction medium |
|----------------------------------|----------------------|-----------------------------------------|
| 2,4-D 1.0 mg/L                   | 78.57                | -                                       |
| 2,4-D 2.0 mg/L                   | 64.51                | -                                       |
| 2,4-D 1.0 mg/L + NAA @ 0.50 mg/L | 100.00               | -                                       |
| 2,4-D 2.0 mg/L + NAA 0.50 mg/L;  | 100.00               | -                                       |
| Picloram 0.50 mg/L               | 88.88                | -                                       |
| Picloram 1.0 mg/L                | 90.91                | -                                       |
| Dicamba 0.50 mg/L                | 84.00                | 9.75%                                   |
| Dicamba 1.0 mg/L                 | 76.92                | -                                       |
| TDZ 0.25 mg/L                    | 96.87                | -                                       |
| TDZ 0.50 mg/L                    | 100.00               | -                                       |

324

325



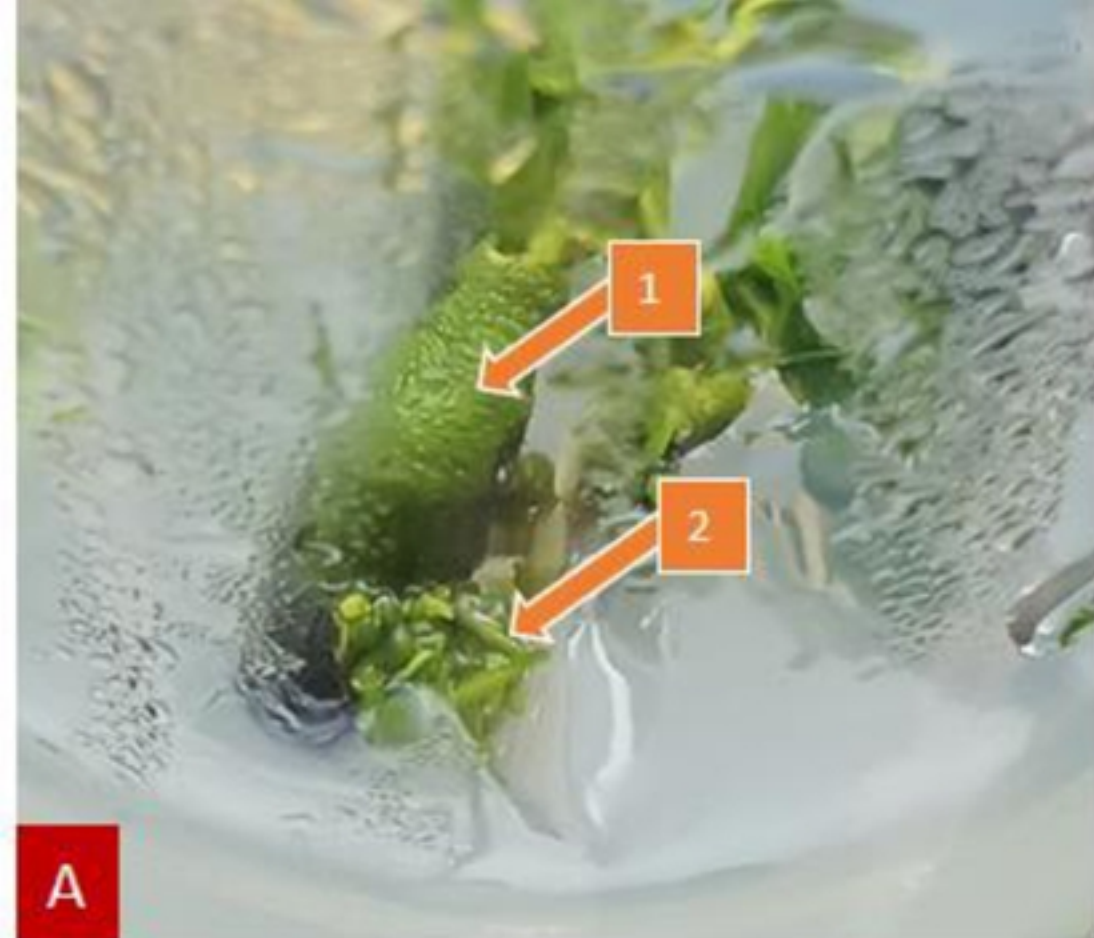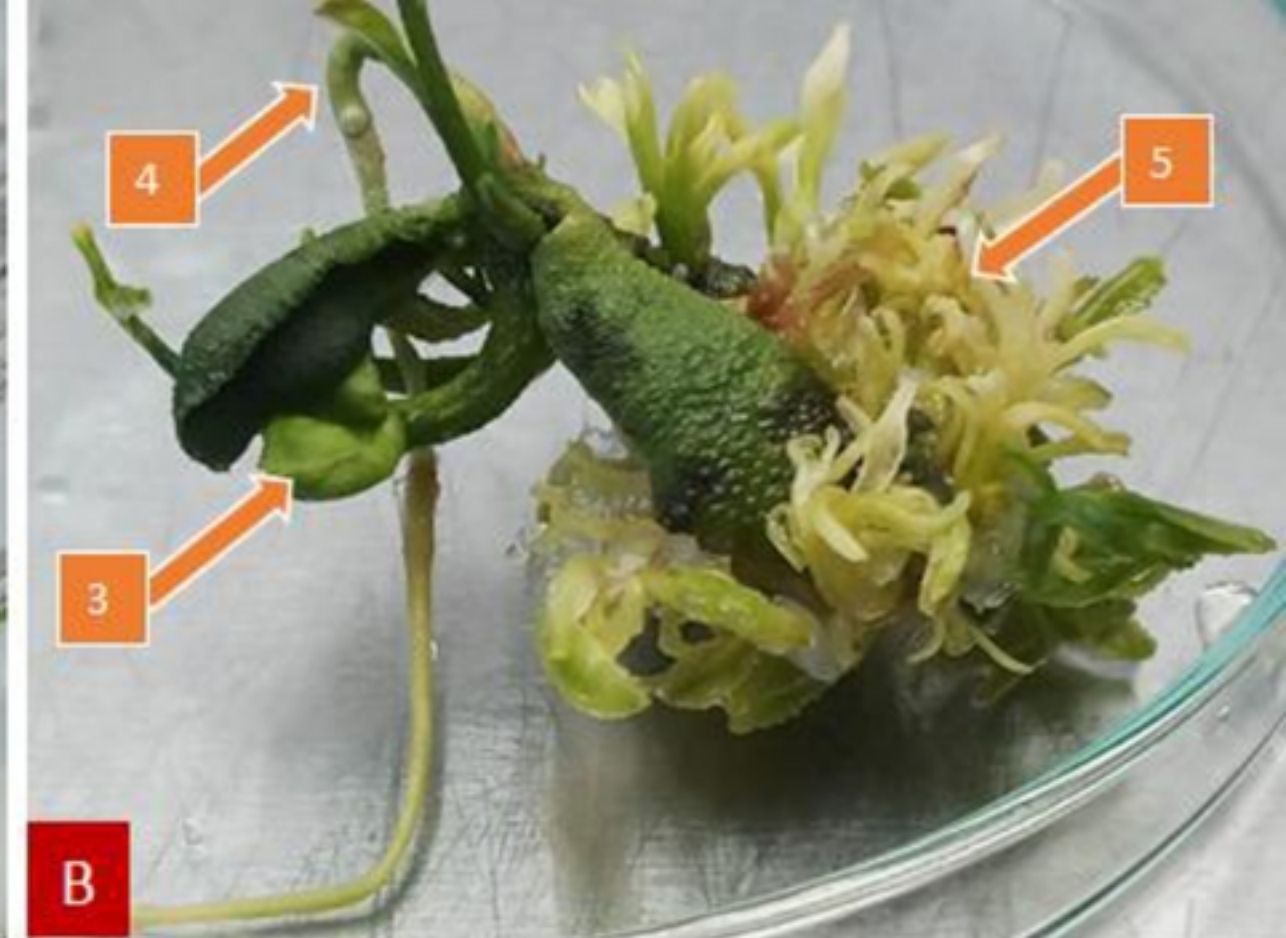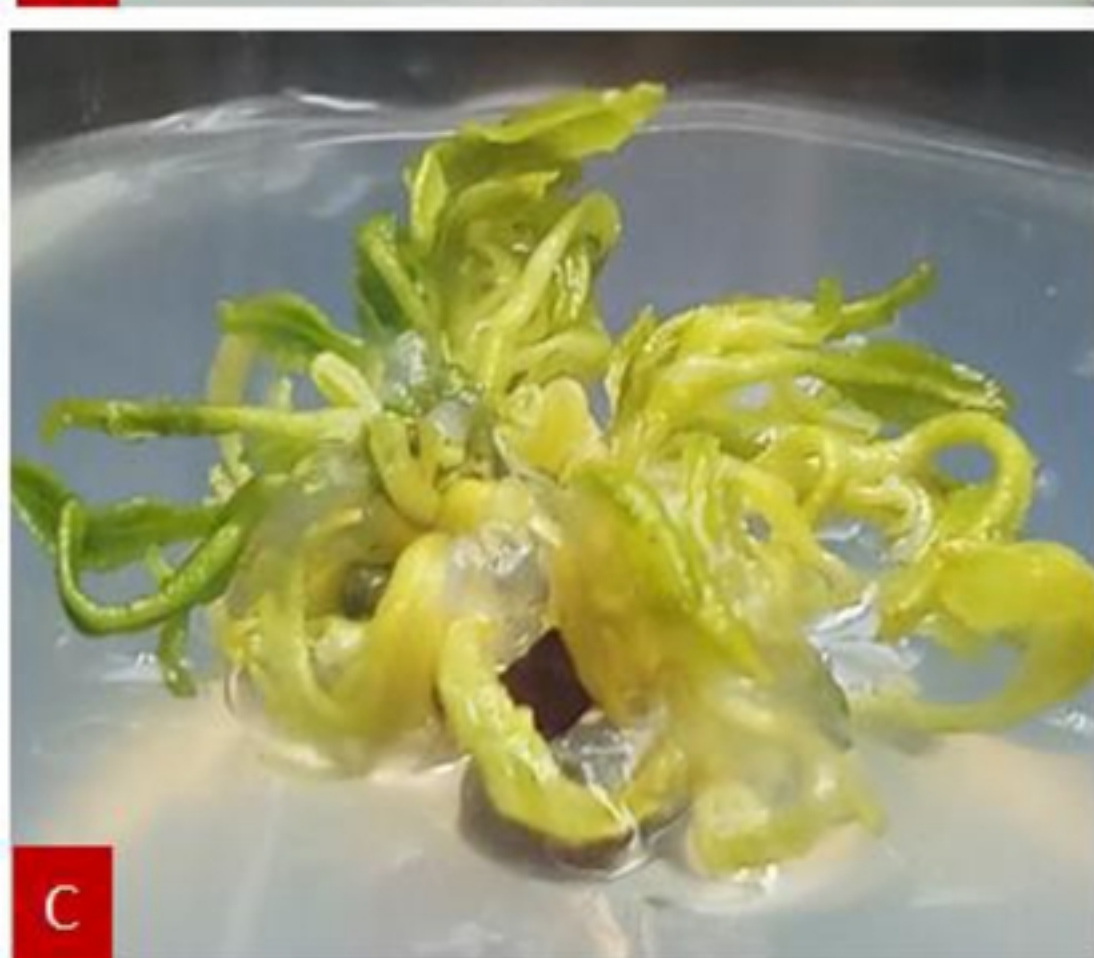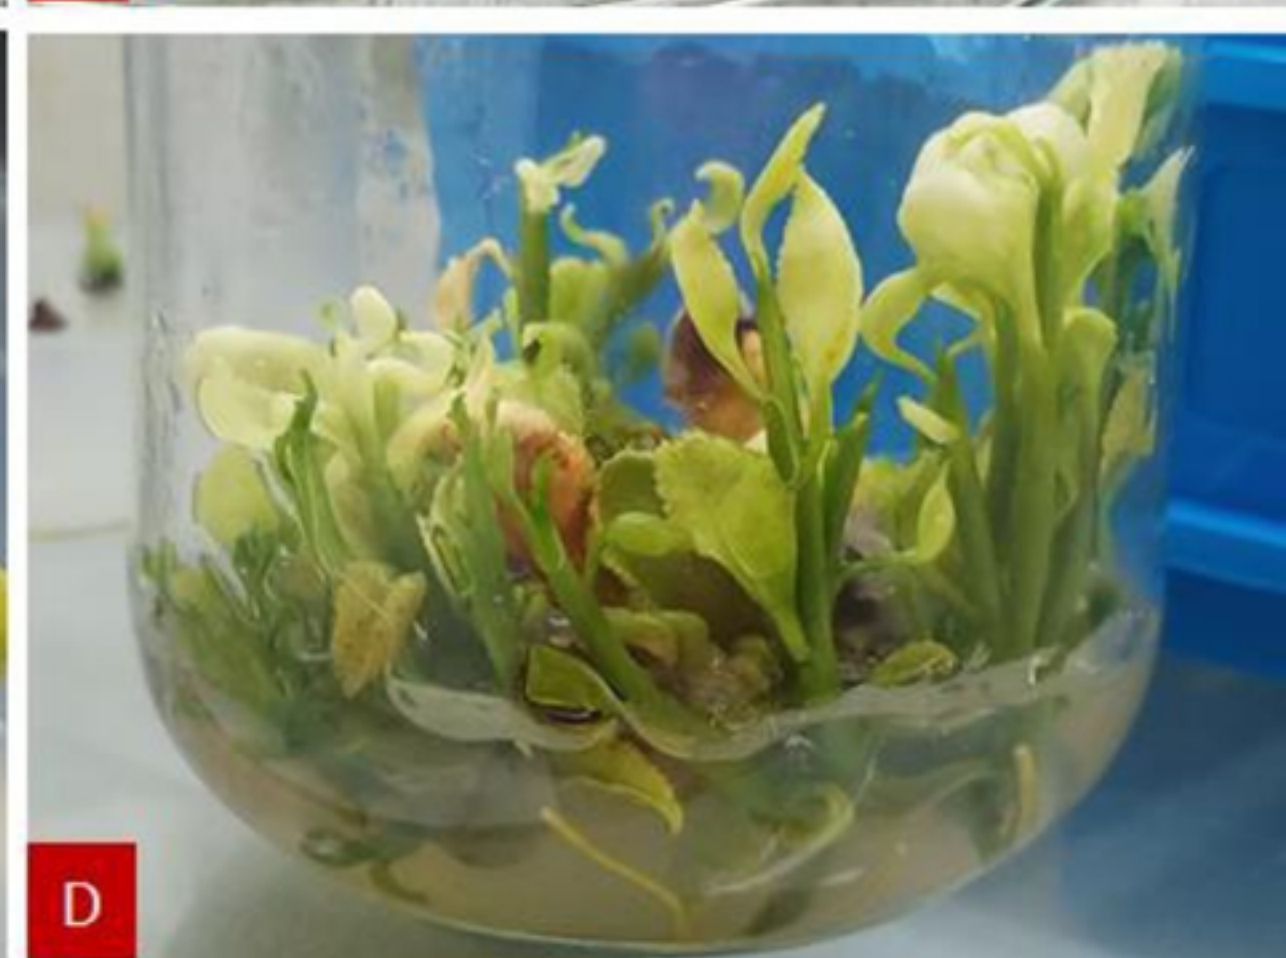

Fig 1

bioRxiv preprint doi: <https://doi.org/10.1101/2020.09.30.320077>; this version posted September 30, 2020. The copyright holder for this preprint (which was not certified by peer review) is the author/funder, who has granted bioRxiv a license to display the preprint in perpetuity. It is made available under aCC-BY 4.0 International license.

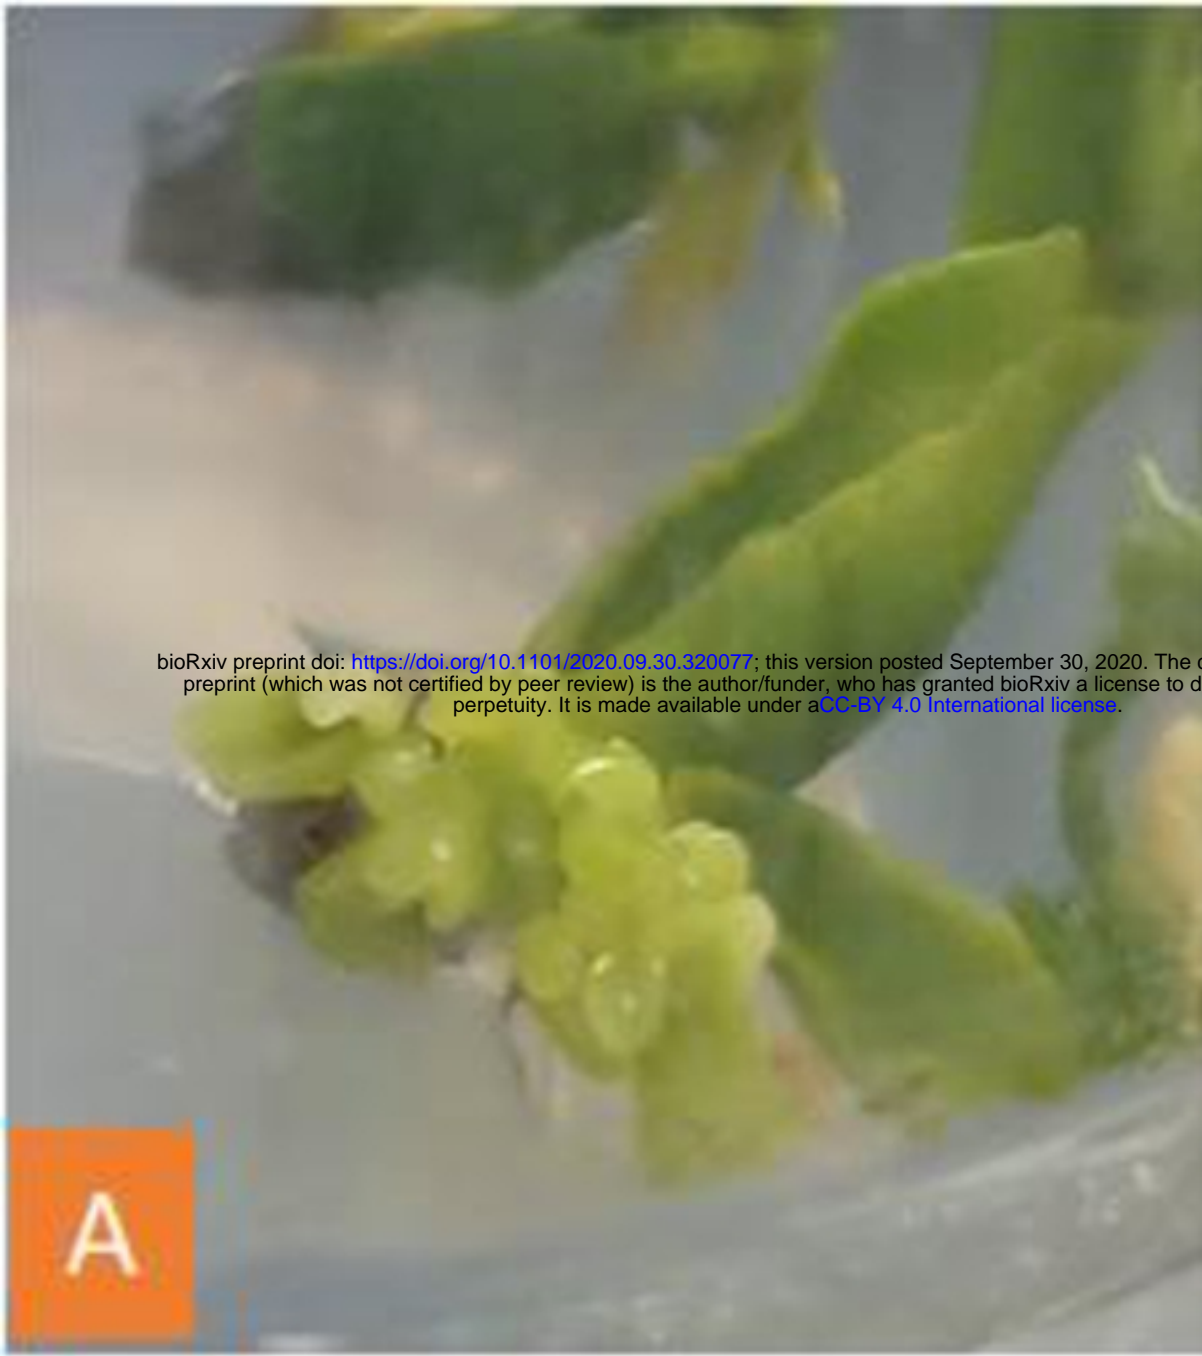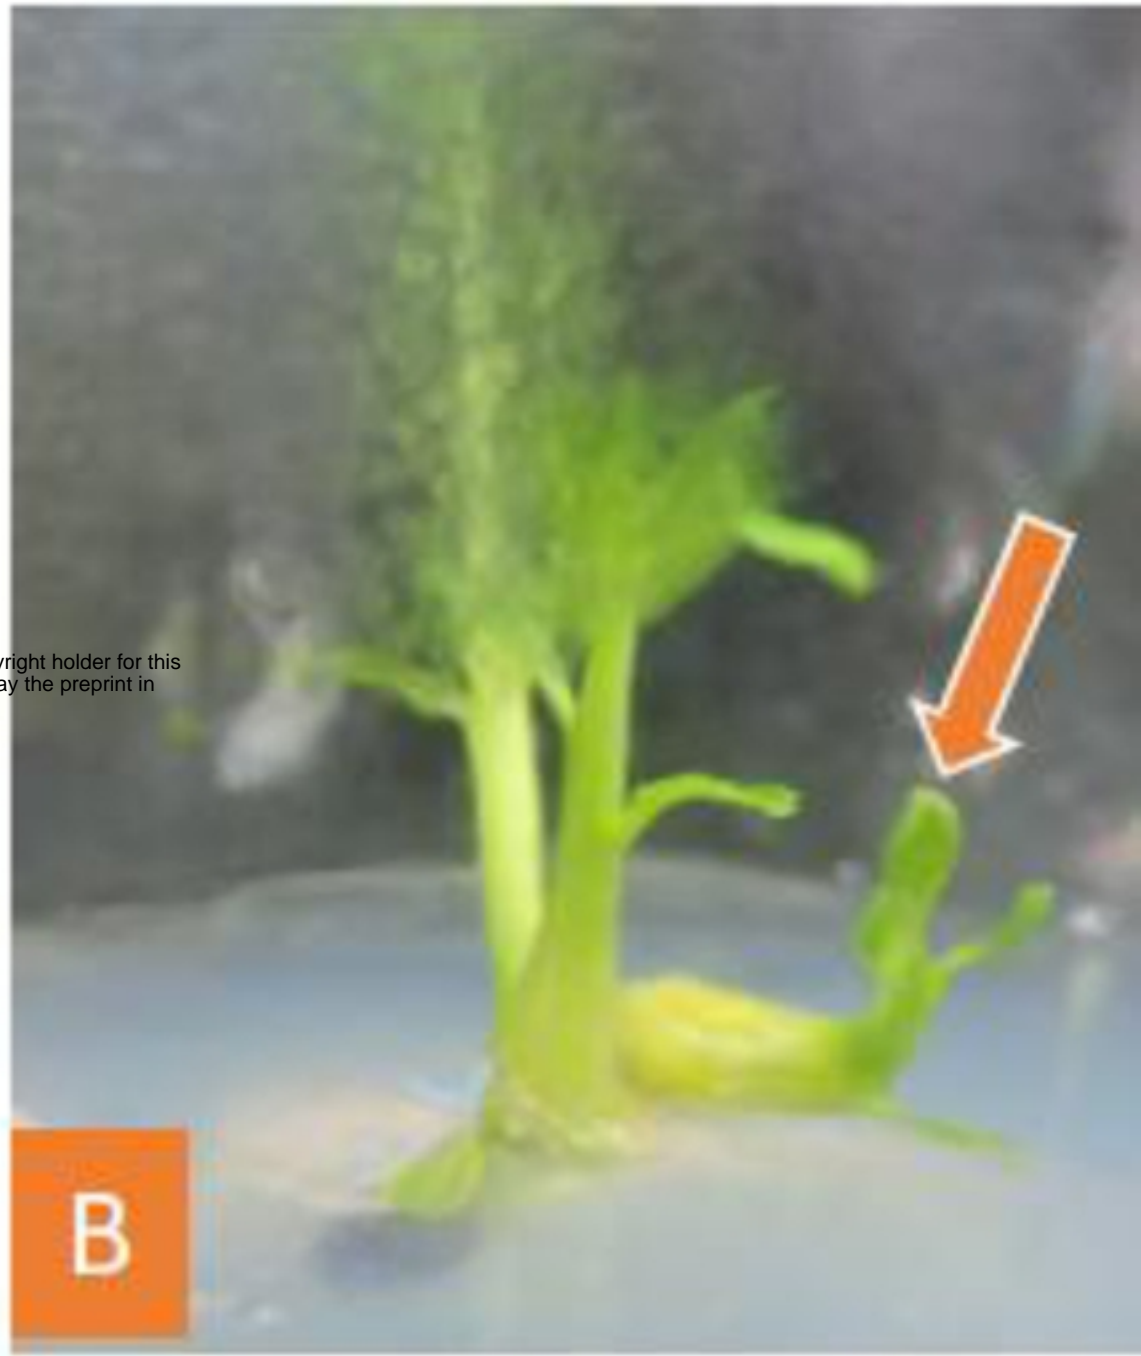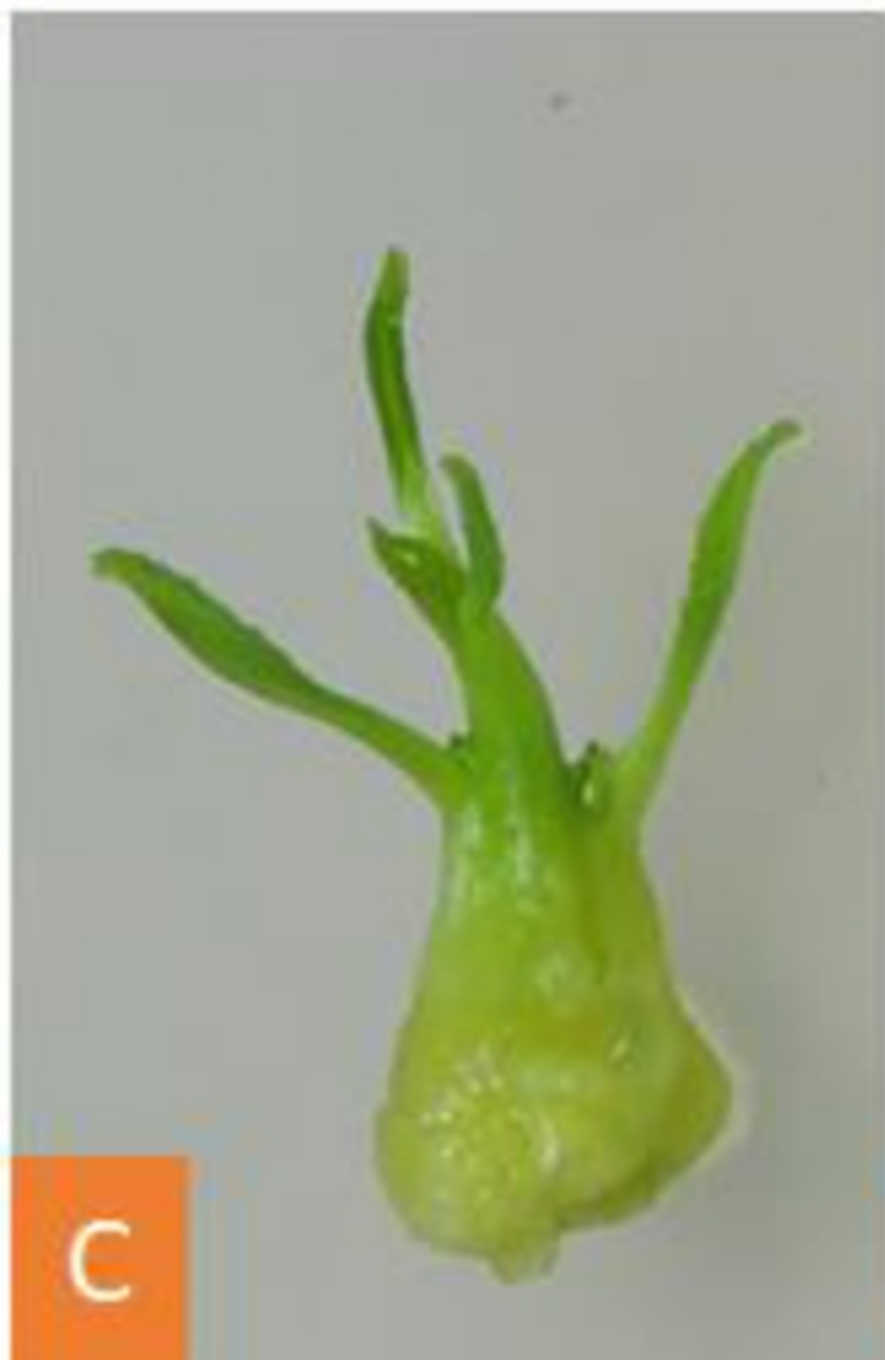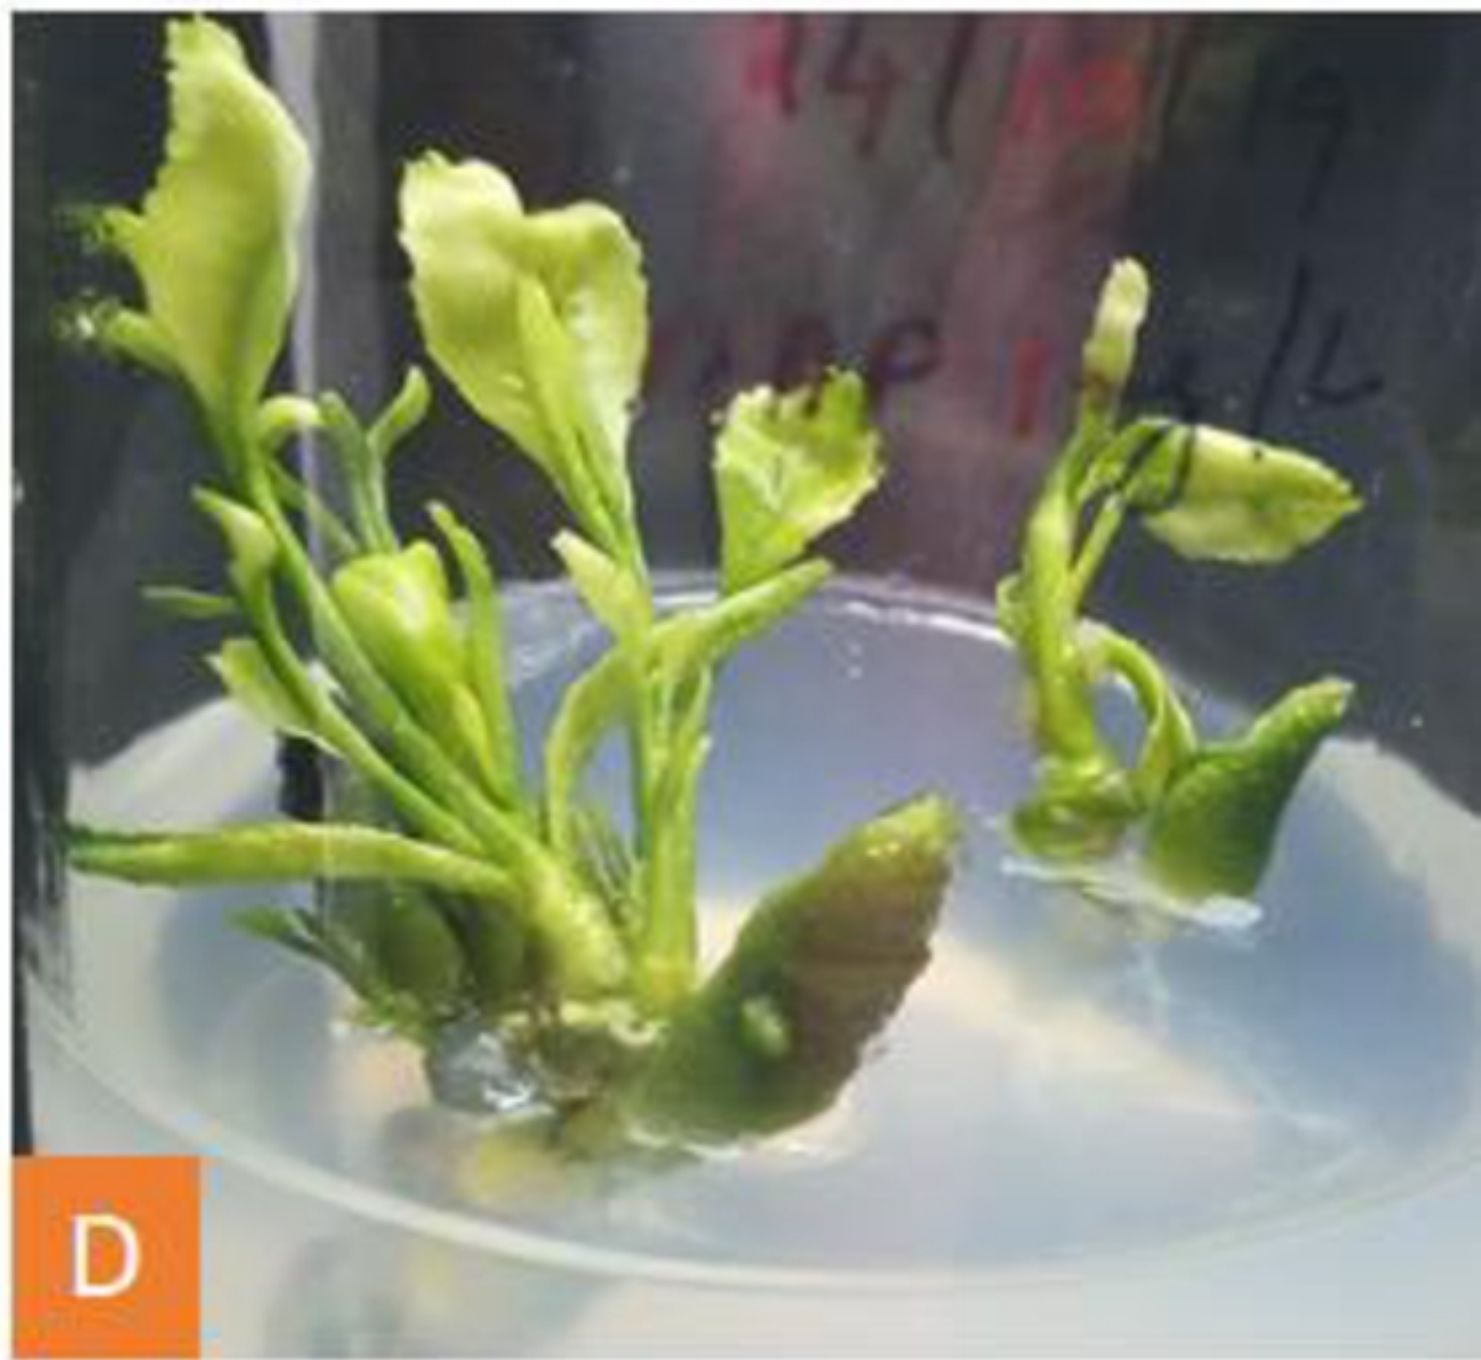

Fig 2

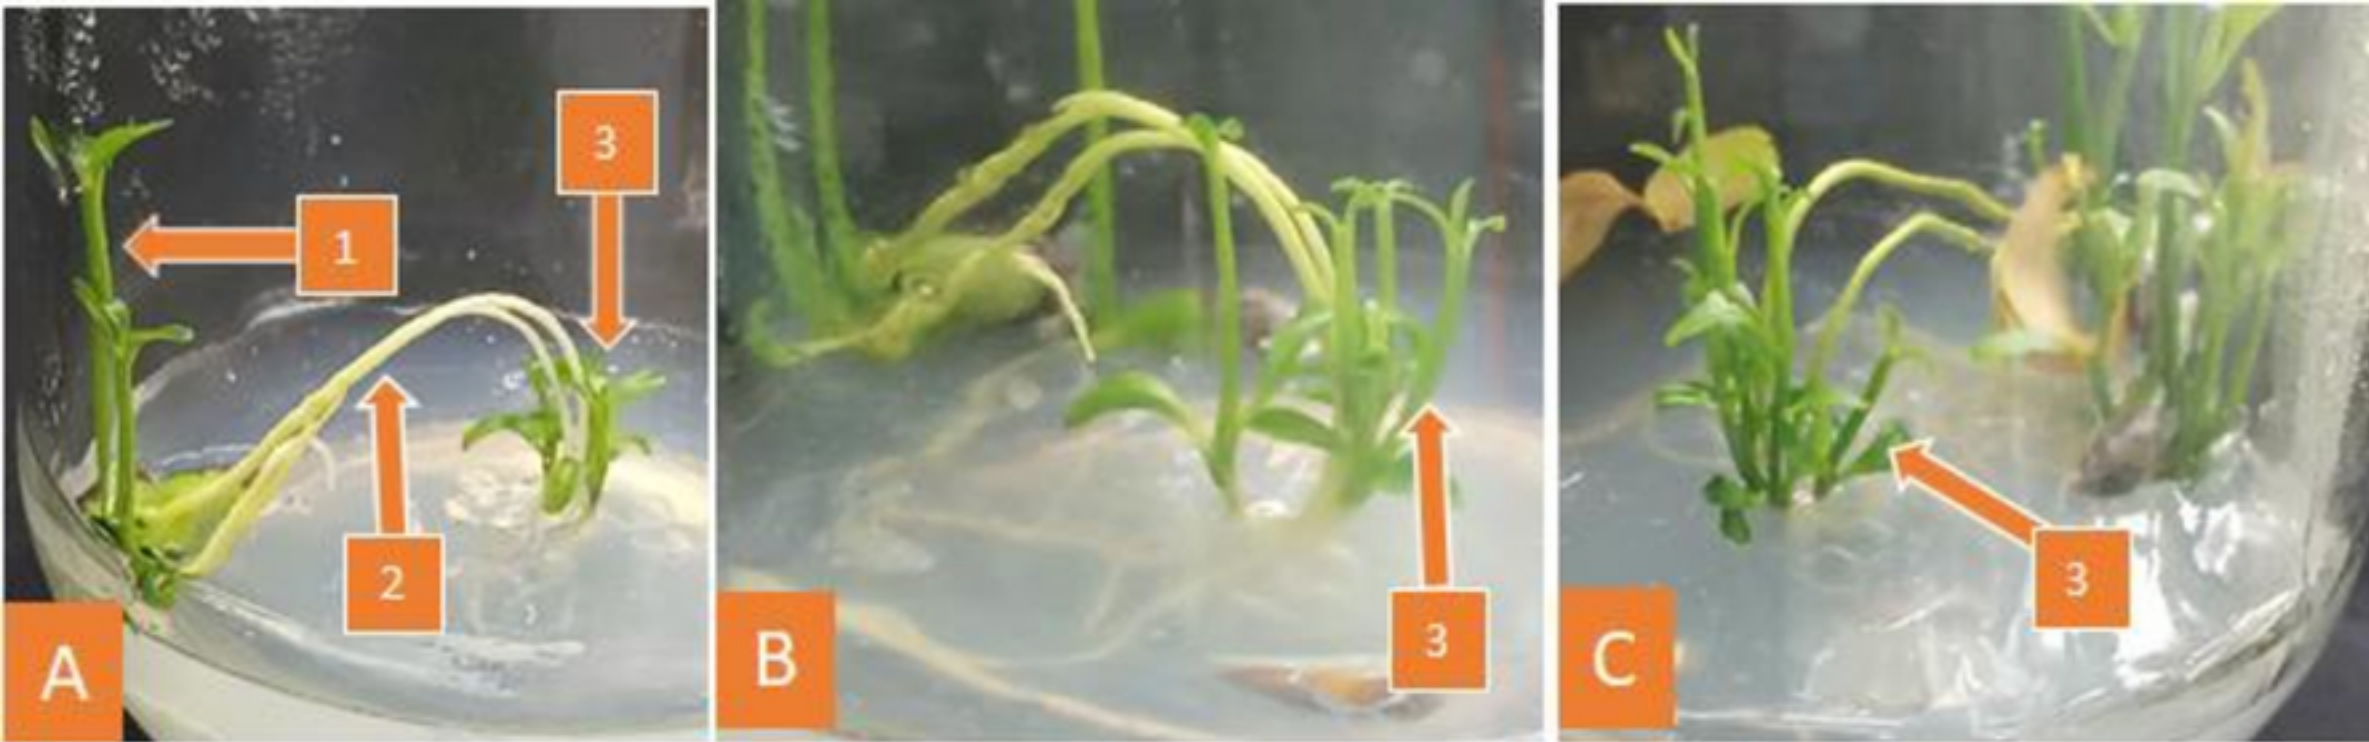

Fig 3

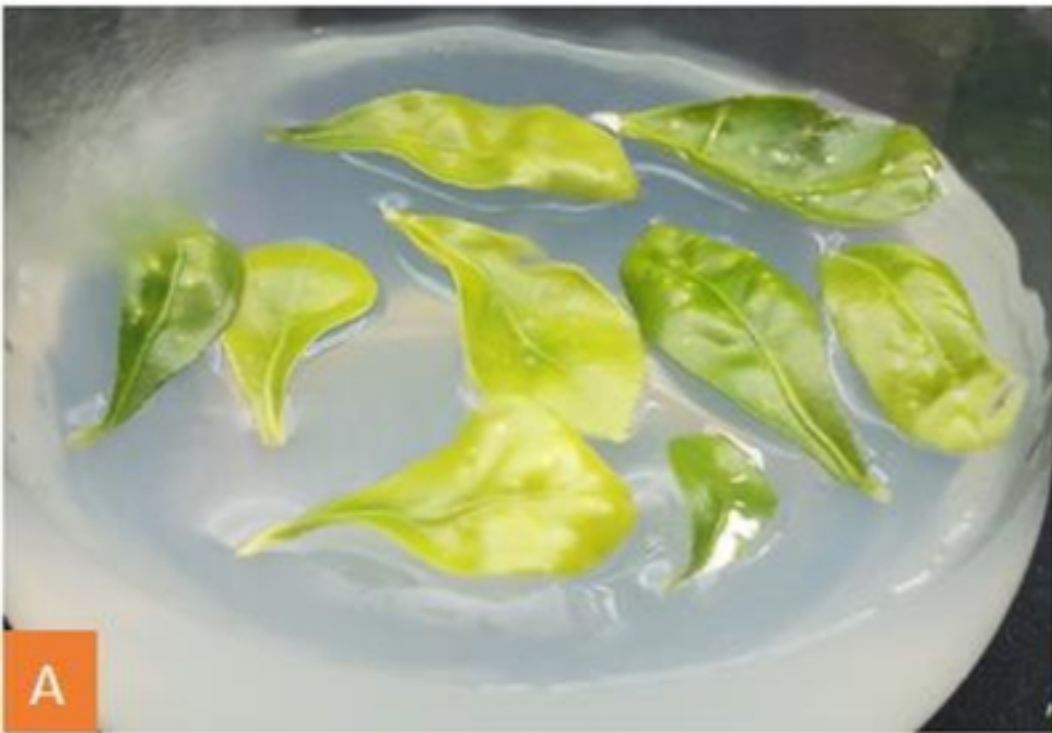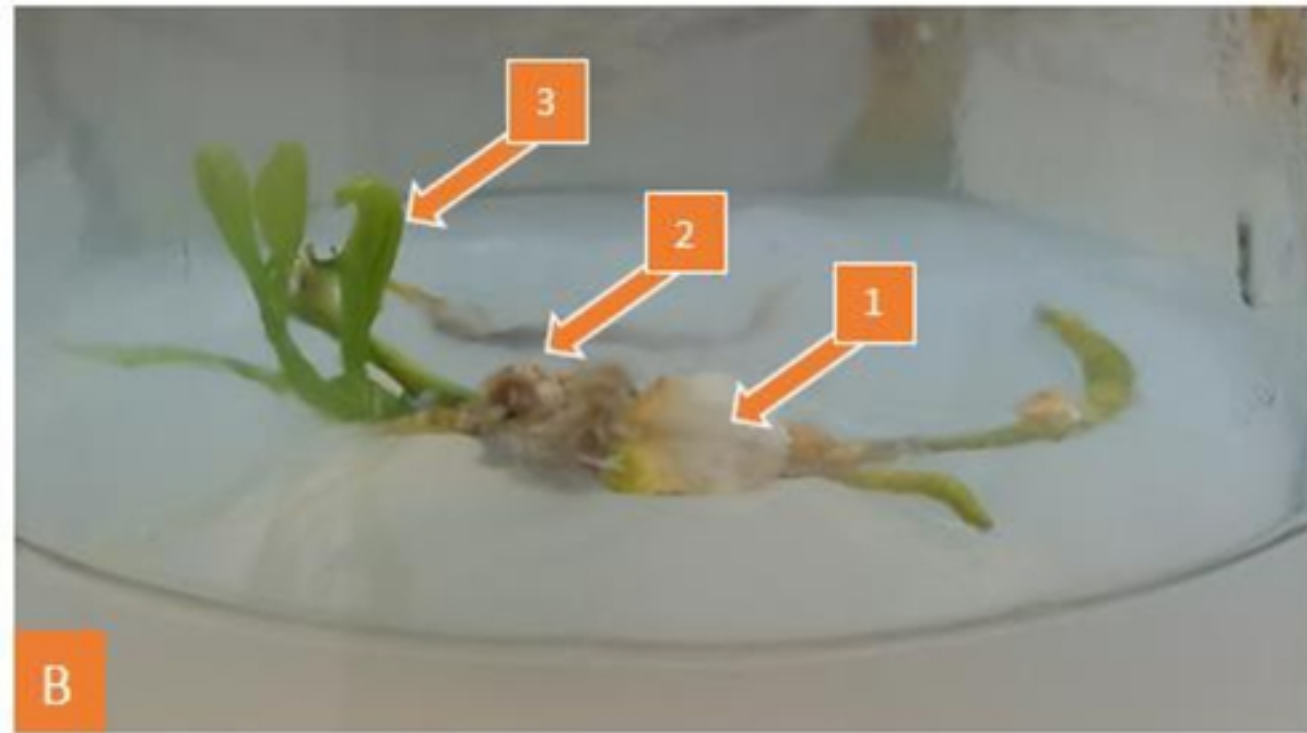

Fig 4
